# Supplementary material
Source: PubMed Central journal article supplement (PMC8090849)
Supplement: EMBJ-40-e106491-s008.pdf [file EMBJ-40-e106491-s008.pdf]

## Expanded View Figures

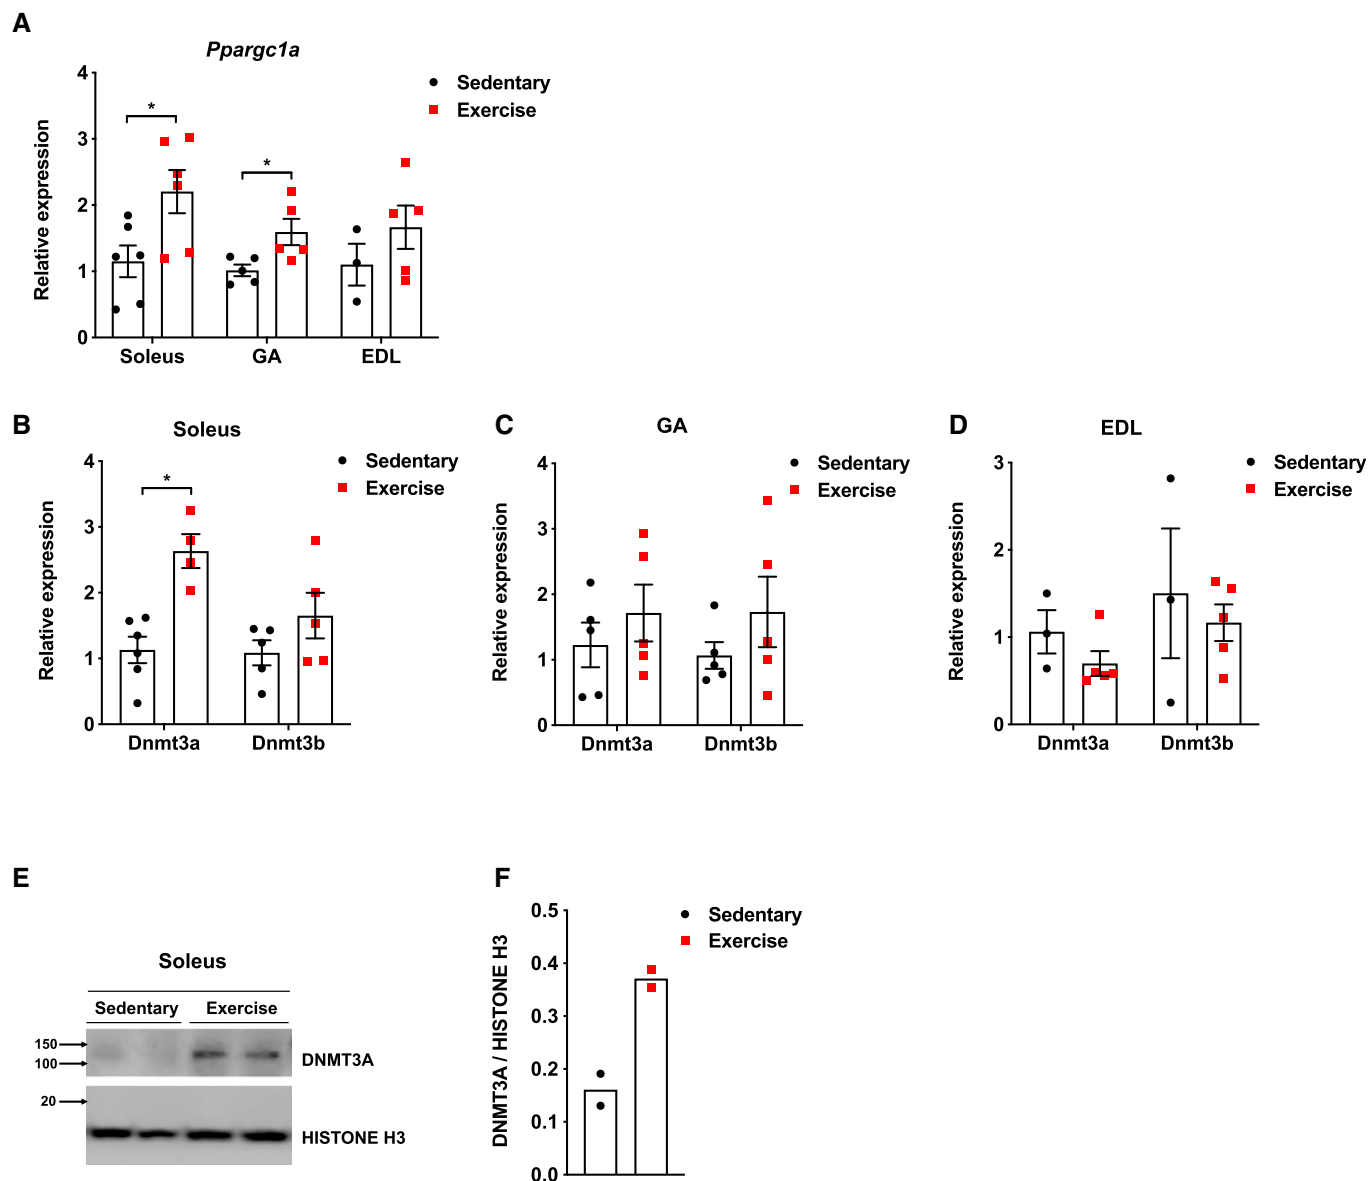

**Figure EV1. *Dnmt3a* levels are upregulated in soleus and GA muscles after a bout of endurance exercise.**

A *Ppargc1a* was measured in various muscle types from C57BL/6j mice at rest and after a bout of low-intensity exercise ( $n = 6$  Soleus,  $n = 5$  GA,  $n = 3$  EDL Sedentary and  $n = 5$  EDL exercise, means  $\pm$  SEM,  $*P < 0.05$ , two-tailed Student's *t*-test).

B–D Transcript levels of genes encoding *de novo* DNMTs were measured in soleus (B), GA (C), and EDL (D) from C57BL/6j mice at rest and after a bout of low-intensity exercise (B:  $n = 6$  Sedentary and  $n = 4$  Exercise for Dnmt3a measurement and  $n = 5$  for Dnmt3b measurement, C:  $n = 5$ , D:  $n = 3$  Sedentary and  $n = 5$  Exercise, means  $\pm$  SEM,  $*P < 0.05$ , two-tailed Student's *t*-test).

E, F (E) Soleus DNMT3A protein level in the nuclear fraction from (A) was measured by immunoblotting and (F) normalizing to Histone H3 using ImageJ.

Source data are available online for this figure.

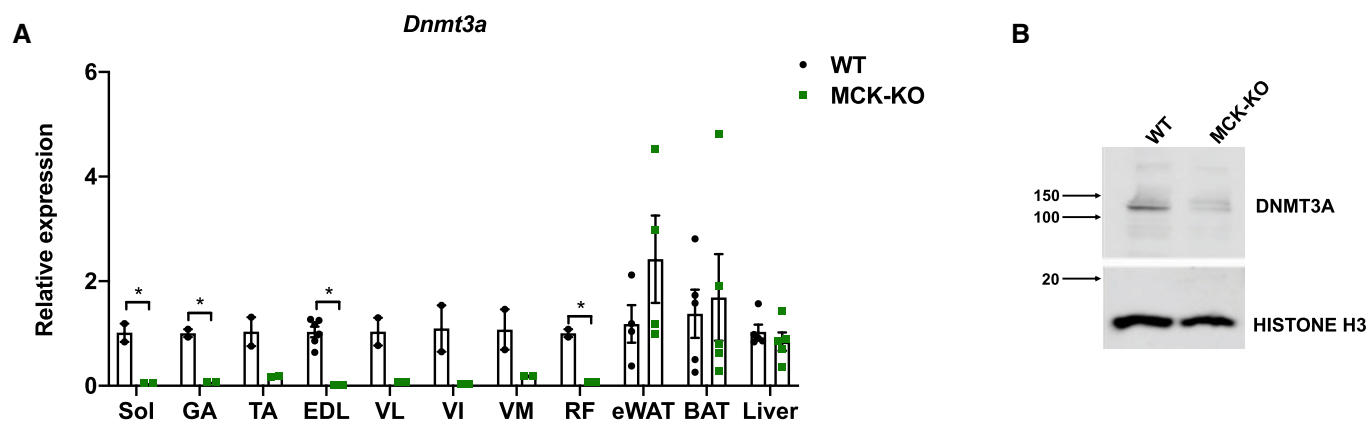

**Figure EV2. Establishment of muscle-specific knockout of *Dnmt3a* using MCK-Cre.**

A *Dnmt3a* mRNA expression measured in various tissues from WT and MCK-KO by qPCR analysis ( $n = 2$  for soleus, GA, TA, VL, VI, VM, and RF  $n = 5$  for EDL, BAT, Liver,  $n = 4$  for eWAT, means  $\pm$  SEM,  $*P < 0.05$ , two-tailed Student's *t*-test). eWAT (epididymal white adipose tissue), Quad (quadriceps), Sol (soleus), TA (tibialis anterior), VL (vastus lateralis), VI (vastus intermedius), VM (vastus medialis), RF (rectus femoris).

B DNMT3A protein expression was assessed by immunoblotting using nuclear extract from WT and MCK-KO soleus muscle.

Source data are available online for this figure.

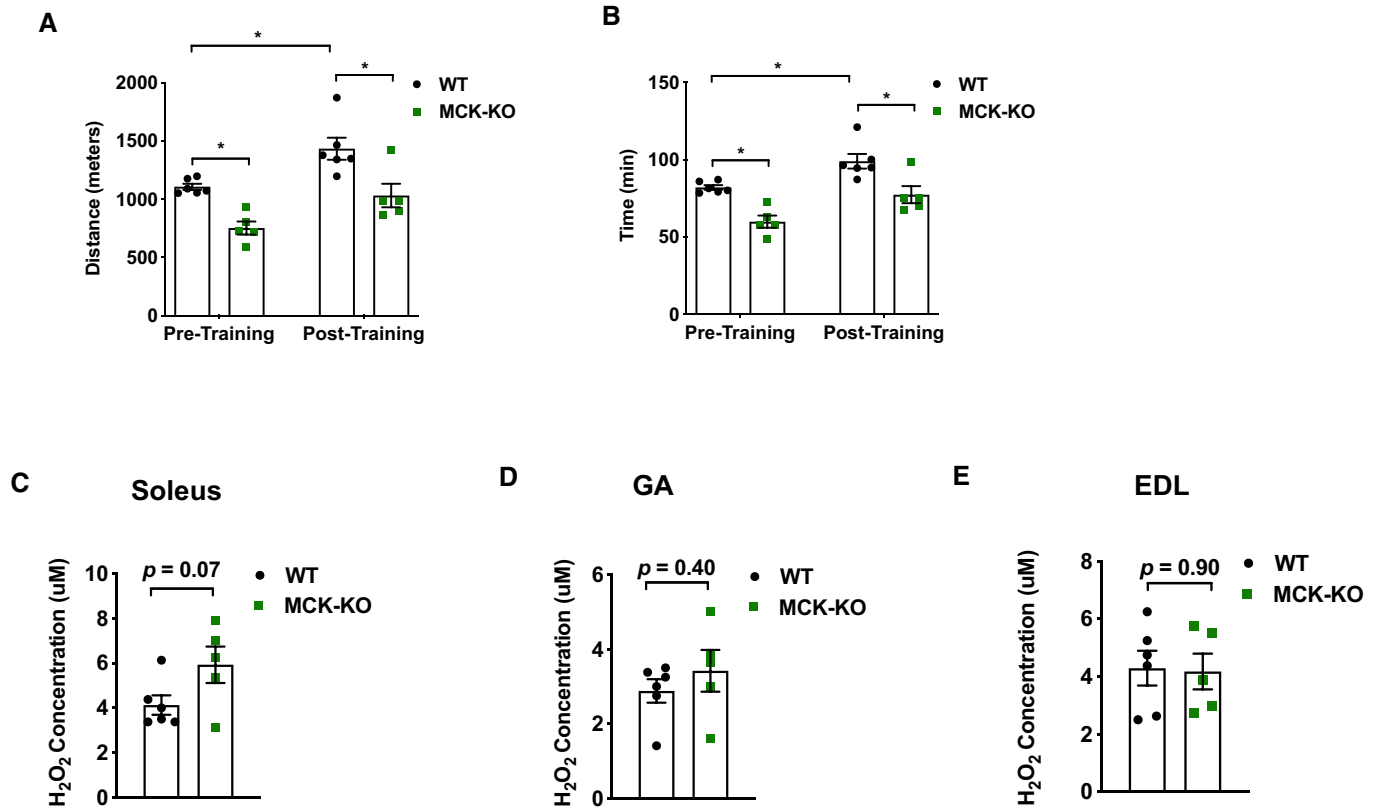

**Figure EV3. Response to an exercise training of MCK-Dnmt3a KO mice.**

A, B Exercise capacity of MCK-KO and WT from the low-intensity regimen accomplished during initial (pretraining) and final exercise testing (post-training) following 4 weeks of treadmill training ( $n = 6$  WT,  $n = 5$  MCK-KO, means  $\pm$  SEM,  $*P < 0.05$ , two-tailed Student's *t*-test and two-way ANOVA followed by Bonferroni *post hoc* testing).

C–E Hydrogen peroxide ( $H_2O_2$ ) levels were measured in WT and MCK-KO after 4 weeks of treadmill training in soleus (C), GA (D) and EDL (E). ( $n = 6$  WT,  $n = 5$  MCK-KO means  $\pm$  SEM, two-tailed Student's *t*-test).

Source data are available online for this figure.

**Figure EV4. *Dnmt3a*-KO soleus and GA muscles display a decreased trend in oxidative capacity at 5 weeks of age following exercise.**

A–F Succinate dehydrogenase staining and quantification was performed in WT and MCK-KO after a bout of low-intensity exercise for 50 min in soleus (A, B) GA (C, D) and EDL (E, F; 10 $\times$ , 20 $\times$  magnifications), and the staining intensity was quantified using ImageJ ( $n = 6$ , means  $\pm$  SEM, two-tailed Student's *t*-test).

Source data are available online for this figure.

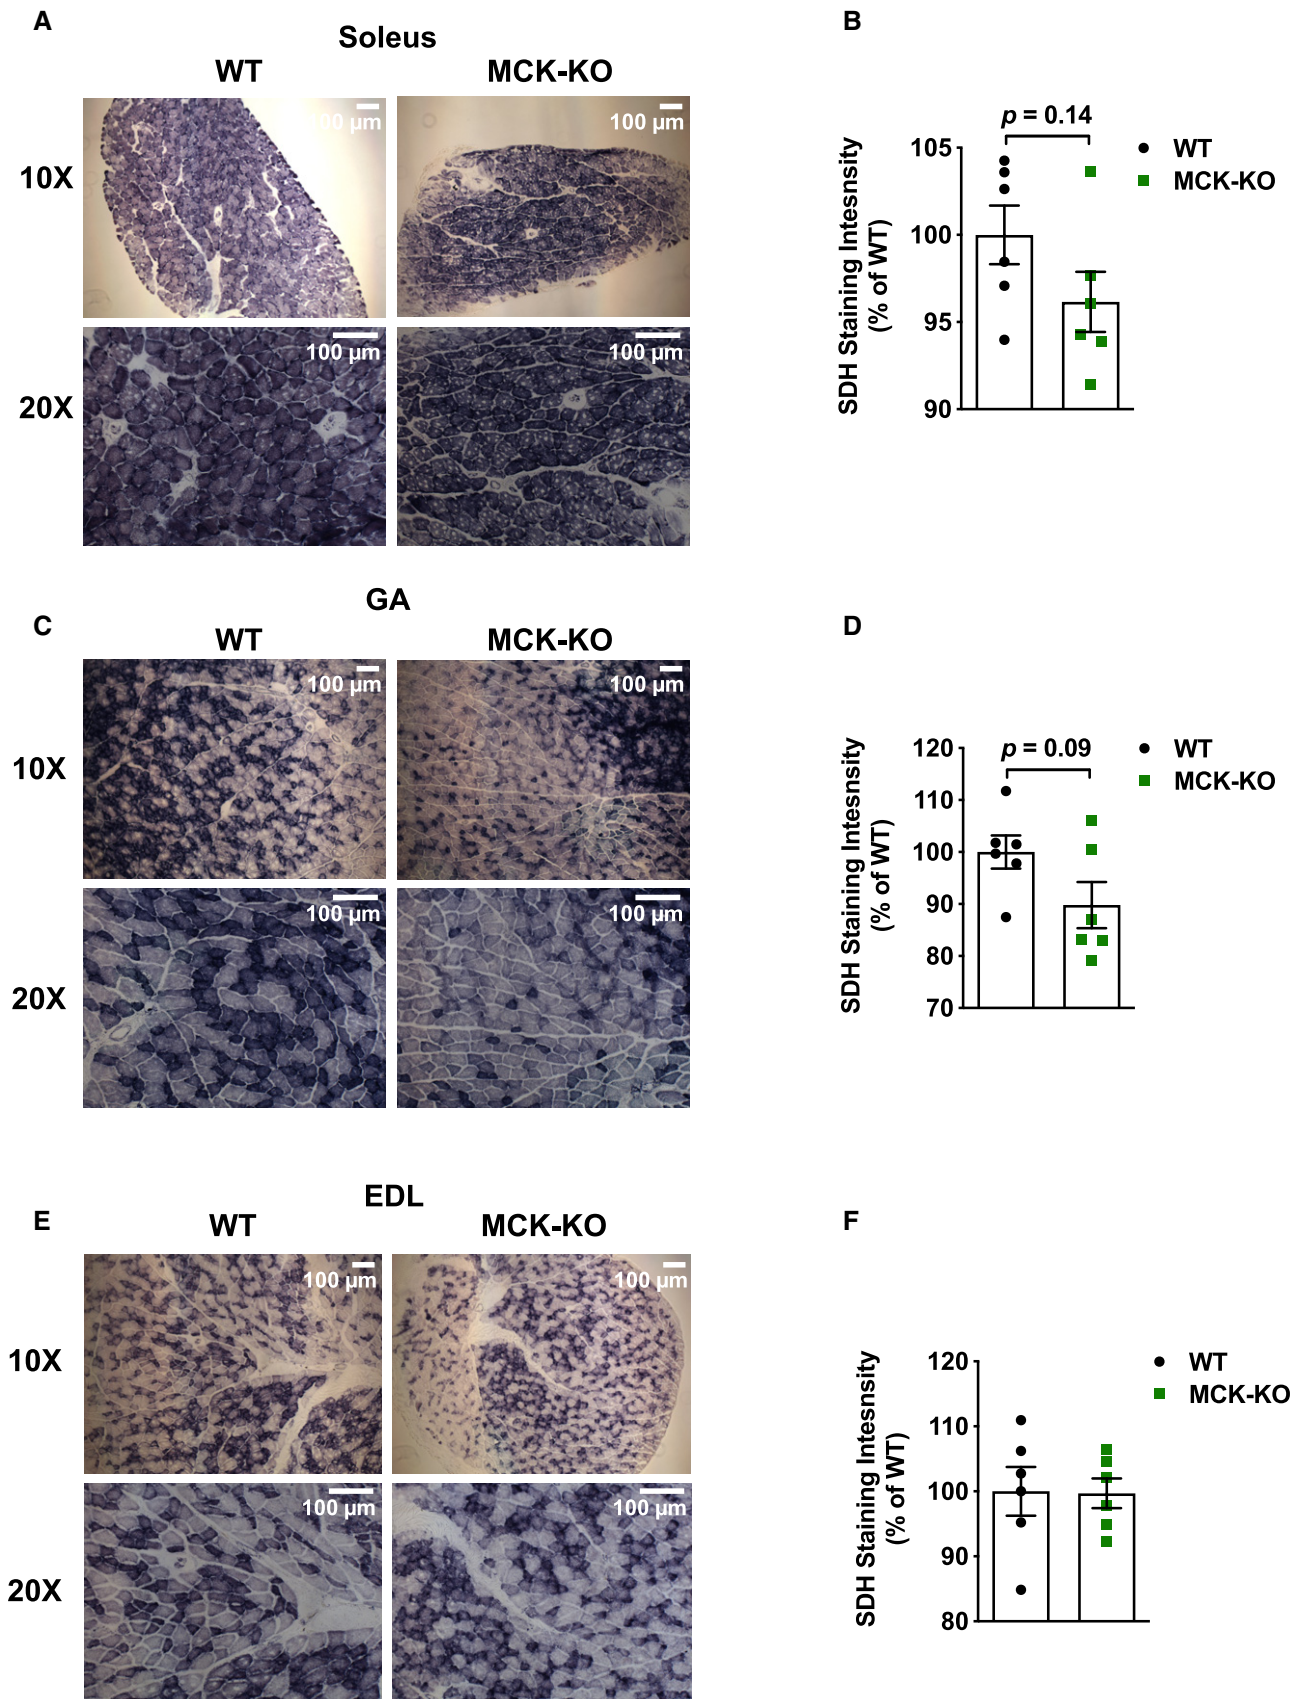

Figure EV4.

**Figure EV5. Distribution of MHC isoforms is unchanged in Dnmt3a KO muscles.**

A–F Cross sections and quantification of WT and MCK-KO soleus (A, B), GA (C, D), and EDL (E, F) stained with antibodies that are MHC fiber-specific (type I [blue], IIA [green], IIB [red], and IIX [unstained]). ( $n = 3$ , data are expressed as means  $\pm$  SEM, two-tailed Student's  $t$ -test).

G The mRNA expression of muscle subtype-specific MHC isoforms was measured in WT and MCK-KO soleus muscles ( $n = 6$ ,  $*P < 0.05$ , means  $\pm$  SEM, two-tailed Student's  $t$ -test).

Source data are available online for this figure.

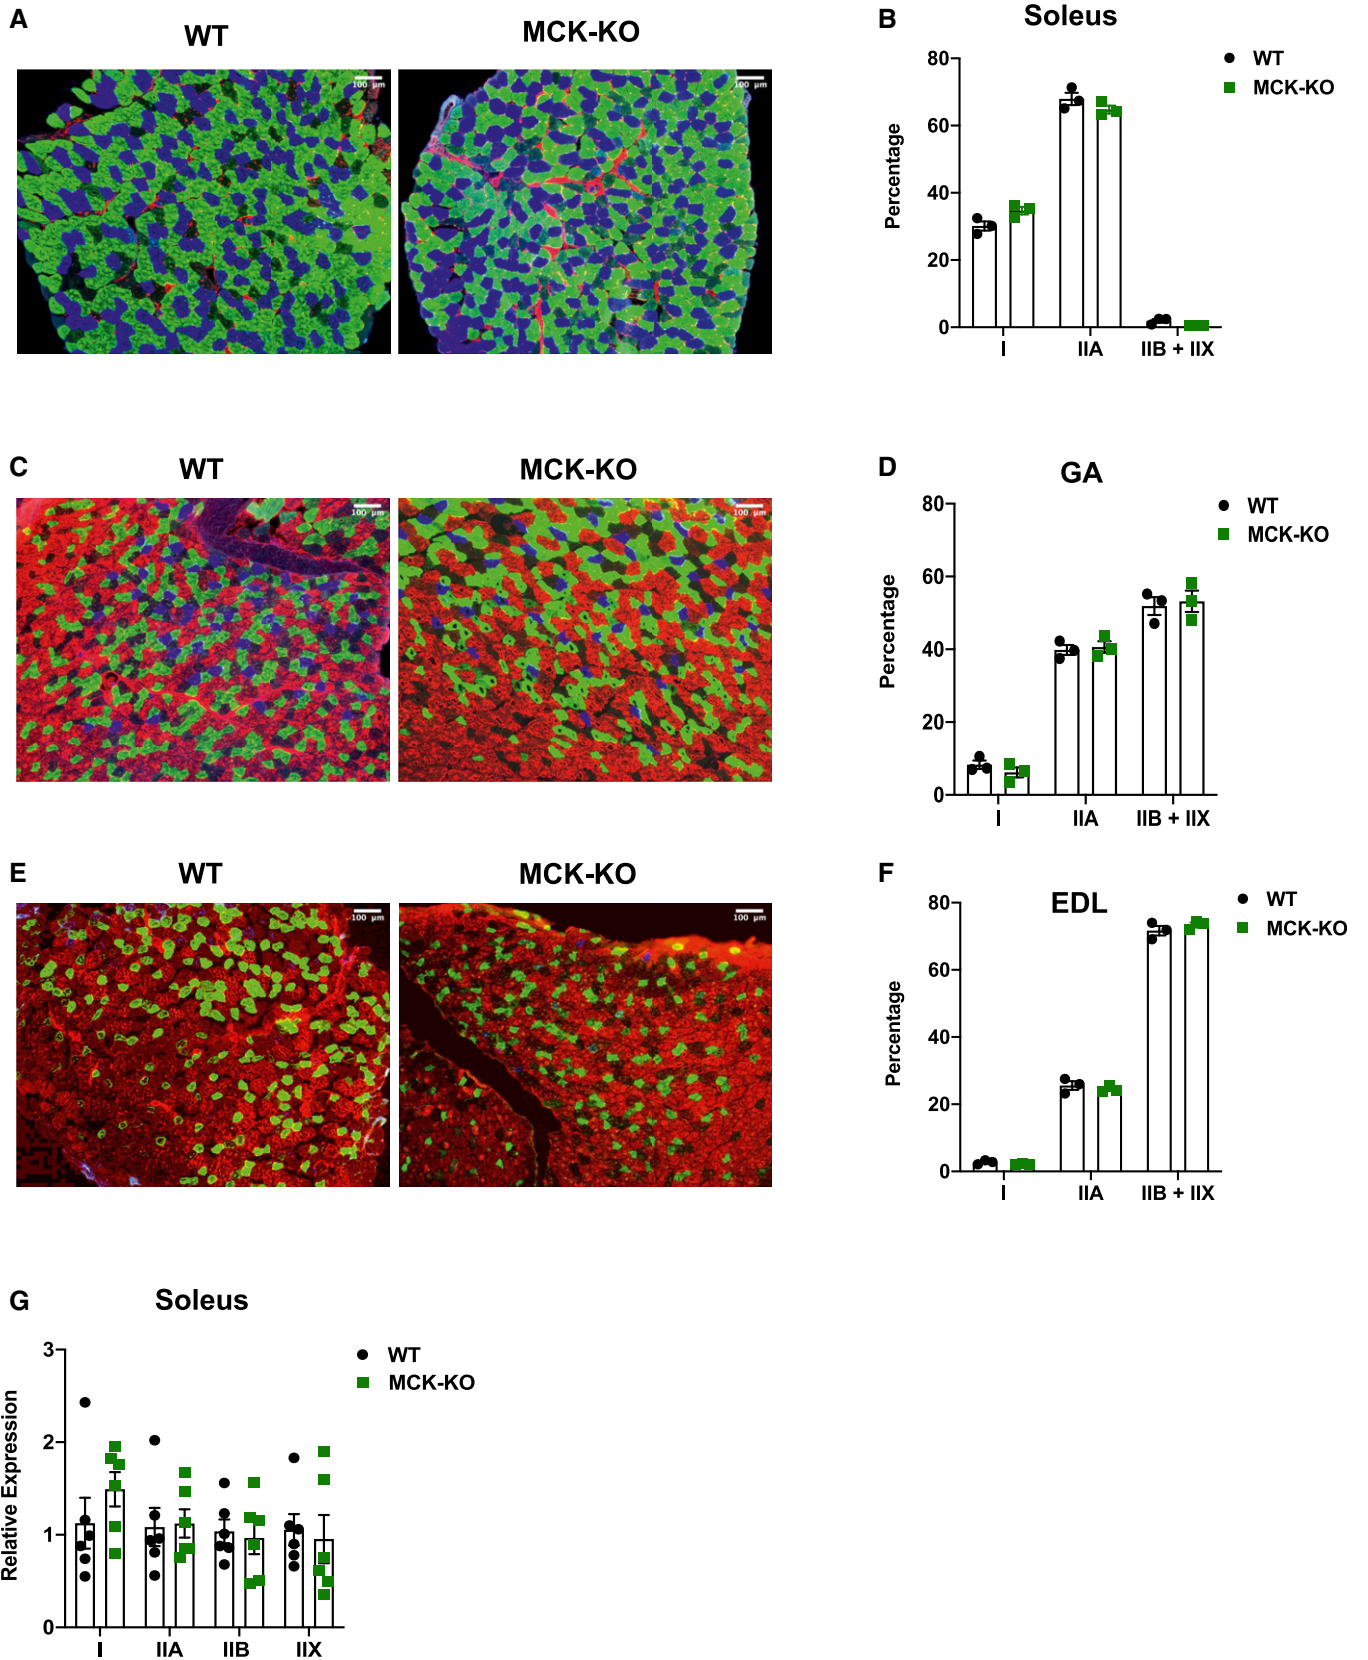

Figure EV5.
